## **Correction: Improving the Precision of the Structure–Function Relationship by Considering Phylogenetic Context**

Boris E. Shakhnovich

DOI: 10.1371/journal.pcbi.0010009

In *PLoS Computational Biology*, vol 1, issue 1.

The Editor for this research article was incorrectly given as Philip Bourne. The Editor was Burkhard Rost, Columbia University, United States of America.

This correction note may be found online at DOI: 10.1371/journal.pcbi.0010038.

Published August 26, 2005

Citation: (2005) Correction: Improving the precision of the structure–function relationship by considering phylogenetic context. *PLoS Comp Biol* 1(3): e38.
